# Supplementary material for: The effect of ambient oxygen on the thermal performance of a cockroach, Nauphoeta cinerea
Source: Oxford University Press journal article supplement (doi:10.1242/jeb.208306), 2020-01-01
Supplement: jeb208306supp.pdf [file jeb208306supp.pdf]

## SUPPLEMENTARY MATERIALS

**Table S1.** Weekly mortality (%) of *N.cinerea* developed under different temperature treatments.

| Temperature (°C) | Week 1 | Week 2 | Week 3 | Week 4 | Week 5 |
|------------------|--------|--------|--------|--------|--------|
| 10               | 22     | 94     | 100    | 100    | 100    |
| 14               | 6      | 24     | 32     | 48     | 60     |
| 18               | 6      | 6      | 8      | 10     | 20     |
| 22               | 10     | 10     | 12     | 14     | 18     |
| 25               | 6      | 18     | 18     | 20     | 24     |
| 30               | 16     | 18     | 20     | 24     | 28     |
| 33               | 32     | 32     | 36     | 38     | 38     |
| 36               | 42     | 44     | 44     | 48     | 64     |

**Table S2.** Percentage mortality of *N.cinerea* developed under different temperature and oxygen treatments. Mortality was recorded for the first five weeks and at the end of experimentation (Week 12).

| Temperature (°C) | Oxygen (%) | Week 1 | Week 2 | Week 3 | Week 4 | Week 5 | Week 12 |
|------------------|------------|--------|--------|--------|--------|--------|---------|
| 28.3             | 10         | 3.75   | 6.25   | 12.5   | 13.75  | 15     | 34.7    |
| 28.3             | 21         | 1.25   | 6.25   | 11.25  | 11.25  | 12.5   | 27.7    |
| 28.3             | 40         | 0      | 5      | 8.75   | 12.5   | 13.75  | 35.4    |
| 32.3             | 10         | 2.5    | 7.5    | 10     | 12.5   | 15     | 40.8    |
| 32.3             | 21         | 1.25   | 12.5   | 17.5   | 21.25  | 23.75  | 53.2    |
| 32.3             | 40         | 2.5    | 7.5    | 10     | 16.25  | 18.75  | 46.8    |
| 34.5             | 10         | 10     | 13.75  | 15     | 23.75  | 25     | 62.2    |
| 34.5             | 21         | 1.25   | 3.75   | 8.75   | 16.25  | 20     | 50      |
| 34.5             | 40         | 0      | 5      | 13.75  | 21.25  | 30     | 96.3    |

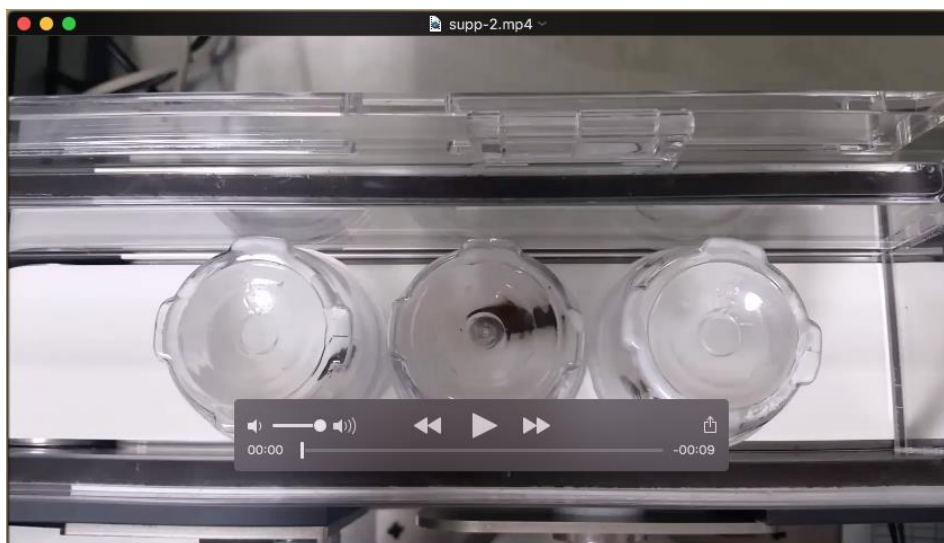

**Movie 1.** Running performance of *N. cinerea*, measured as the total time spent continuously running on a treadmill (LE8708TS, Harvard Apparatus, Holliston, Massachusetts, USA) under normoxia. Plastic cups lined with fluon were placed over individuals to prevent escape during measurements.
